# Supplementary material
Source: PubMed Central journal article supplement (PMC7895545)
Supplement: NIHMS1663315-supplement-1.pdf [file NIHMS1663315-supplement-1.pdf]

**Supplementary Figure 1.** Flowchart Diagram of participant selection and exclusion

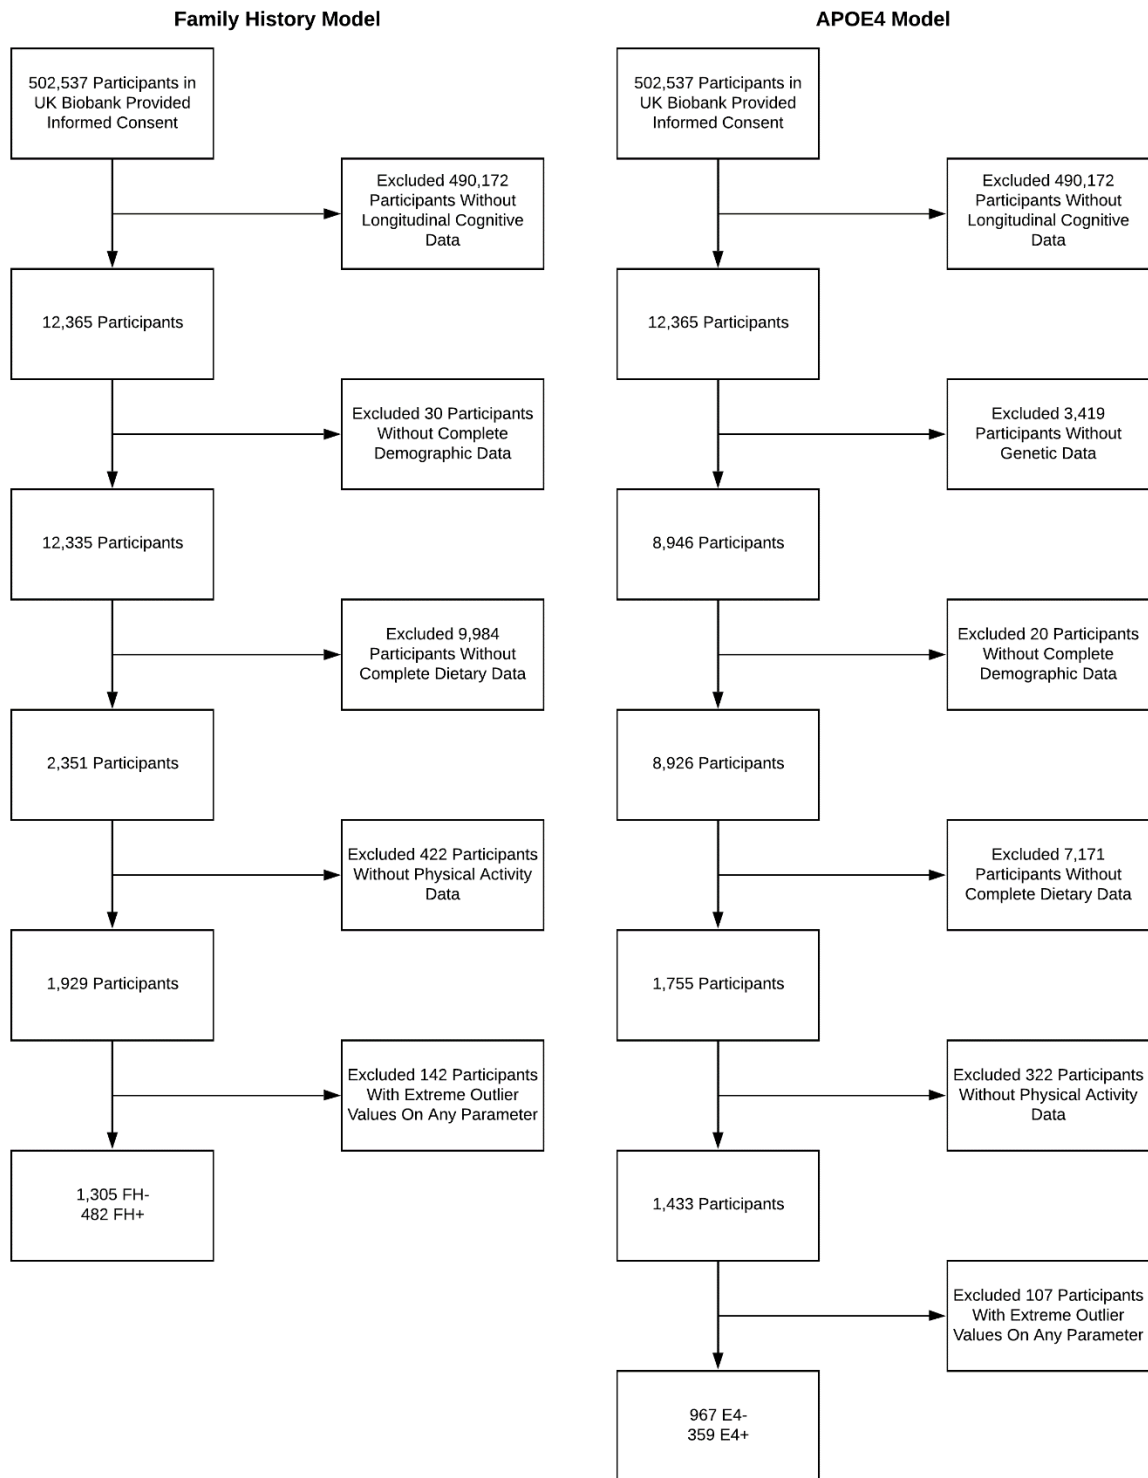

**Supplementary Figure 2.** Timeline of Data Collection

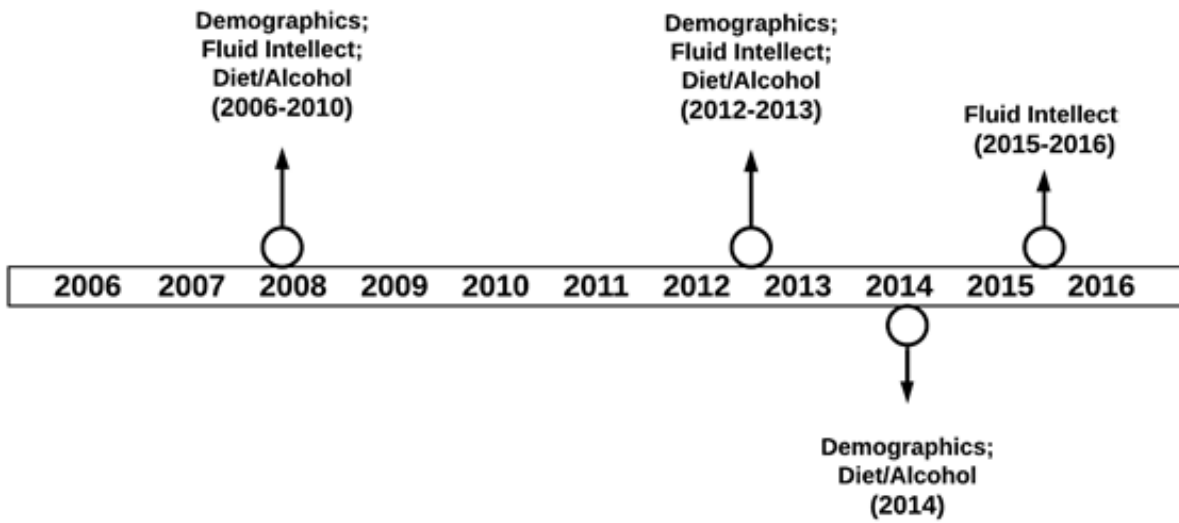

**Supplementary Table 1.** Sensitivity Analysis by Group

| <b>Group</b>  | <b>Sample Size</b> | <b># of Predictors</b> | <b>Power of .90</b> | <b>Power of .95</b> | <b>Power of .99</b> |
|---------------|--------------------|------------------------|---------------------|---------------------|---------------------|
| <b>APOE4-</b> | 967                | 6                      | $f^2=.011$          | $f^2=.013$          | $f^2=.019$          |
| <b>APOE4+</b> | 358                | 10                     | $f^2=.030$          | $f^2=.037$          | $f^2=.052$          |
| <b>FH-</b>    | 1,304              | 13                     | $f^2=.008$          | $f^2=.010$          | $f^2=.014$          |
| <b>FH+</b>    | 482                | 8                      | $f^2=.021$          | $f^2=.027$          | $f^2=.038$          |
